# Supplementary material for: RNA-Seq Analysis Identifies Transcription Factors Involved in Anthocyanin Biosynthesis of ‘Red Zaosu’ Pear Peel and Functional Study of PpPIF8
Source: MDPI journal article supplement (doi:10.3390/ijms23094798), 2022-04-27
Supplement: s1 [file s1]

**Table S1 Primers used in this study.**

| Primers used for DNA constructs            |                                       |                                        |
|--------------------------------------------|---------------------------------------|----------------------------------------|
| Primer Name                                | Forward (5'-3')                       | Reverse (5'-3')                        |
| PpPIF8-pTOPO                               | caccATGAGCCAGCGCTTCCTAGC              | GCCCTTAGAGCTAGATGCTGGAG                |
| PpPIF8-GFP                                 | agaacacgggggactctagaATGAGCCAGCGCTTCCT | cccttgctcaccatggatccGCCCTTAGAGCTAGATGC |
|                                            | AGC                                   | TGGAG                                  |
| Primes used for <i>PpCHS</i> Genome walker |                                       |                                        |
| Primer Name                                | 5'-3'                                 |                                        |
| <i>ProPpCHS</i> -GSP1                      | TTGATCCACACAGTTGGGAGGAGTTG            |                                        |
| <i>ProPpCHS</i> -GSP2                      | TGAGCCTTGCGAACTTCCTCGACAGTC           |                                        |
| Primers used for RT-qPCR                   |                                       |                                        |
| Gene Name                                  | Forward (5'-3')                       | Reverse (5'-3')                        |
| <i>PpPIF8</i>                              | ATGCCAGGGGTGATTTCTGG                  | GAAGGGTGTCATCGTCGTGT                   |
| <i>PpPAL</i>                               | TCCATGGACAACACTCGCTT                  | AGAAACTGCAGCTCGGAACA                   |
| <i>PpC4H</i>                               | AACTTCGAGCTTCTGCCTCC                  | CCCCAAGCATCAATCTACGC                   |
| <i>Pp4CL</i>                               | GATCCGGAGTCGACAAGGAC                  | GGGCCACTTGAAACCCTTTG                   |
| <i>PpCHS</i>                               | TACCGTCGAGGAAGTTCGCA                  | TCGGGATATGTGGCTTGATCC                  |
| <i>PpCHI</i>                               | GCGGTTACATGCAATCCCAG                  | CAGTGCCCATCTTACTGGCT                   |
| <i>PpF3H</i>                               | CAGAAGCCATGGGGTTGGAT                  | CCAAGAGTTAGGTCGGGCTG                   |
| <i>PpF3'H</i>                              | CTCCCTAGAGTGGCTGGACT                  | TCCTTGAGCGACAGCAATGT                   |
| <i>PpF3'5'H</i>                            | ATACCAGTTCGGGTGGAGT                   | GAAGTGCTGGCGTTTGAGG                    |
| <i>PpFLS</i>                               | GCCGGTGGTGATAACTTGGA                  | TGAACATCGTTGGGGACGAG                   |
| <i>PpDFR</i>                               | GGCATCTGTTTCGCGACATTC                 | AAAGCCTCGGACTTGTGGAG                   |
| <i>PpANS</i>                               | CCCACCACGAACCTTTTGCTG                 | ATTTAGCACAACCCGCCTCA                   |
| <i>PpUFGT</i>                              | CTTCAAATGGGTCGGCTCCT                  | ATGGAGCGTCTTGCTTGTC                    |
