# Supplementary material for: RNA-Seq Analysis Identifies Transcription Factors Involved in Anthocyanin Biosynthesis of ‘Red Zaosu’ Pear Peel and Functional Study of PpPIF8
Source: MDPI journal article supplement (doi:10.3390/ijms23094798), 2022-04-27
Supplement: s1 [file s1]

**Table S2. Sequencing data Statistics**

| Samples | Clean reads | Clean bases   | GC Content | %≥Q30  |
|---------|-------------|---------------|------------|--------|
| 0d_r1   | 24,045,281  | 7,182,026,092 | 46.89%     | 94.08% |
| 0d_r2   | 22,431,782  | 6,698,837,974 | 47.19%     | 94.26% |
| 0d_r3   | 23,661,897  | 7,076,303,010 | 46.84%     | 93.78% |
| D_1d_r1 | 22,169,449  | 6,620,661,824 | 47.00%     | 94.18% |
| D_1d-r2 | 20,372,847  | 6,085,888,904 | 47.11%     | 94.31% |
| D_1d-r3 | 22,776,951  | 6,807,991,040 | 47.31%     | 94.37% |
| D_3d-r1 | 22,558,110  | 6,752,424,186 | 46.81%     | 93.73% |
| D_3d-r2 | 22,158,902  | 6,630,899,756 | 46.94%     | 93.88% |
| D_3d-r3 | 23,306,938  | 6,977,305,576 | 46.96%     | 94.13% |
| D_5d-r1 | 25,610,115  | 7,661,973,392 | 46.91%     | 93.42% |
| D_5d-r2 | 22,006,975  | 6,584,487,138 | 46.90%     | 93.88% |
| D_5d-r3 | 24,119,410  | 7,213,856,598 | 47.03%     | 93.87% |
| D_7d-r1 | 23,391,777  | 6,998,400,718 | 46.74%     | 93.62% |
| D_7d-r2 | 24,478,106  | 7,326,402,512 | 46.77%     | 93.35% |
| D_7d-r3 | 21,966,094  | 6,577,158,950 | 46.68%     | 93.36% |
| B_1d-r1 | 24,363,719  | 7,283,561,696 | 47.22%     | 94.51% |
| B_1d-r2 | 23,273,373  | 6,939,629,100 | 47.20%     | 94.53% |
| B_1d-r3 | 23,887,617  | 7,131,761,964 | 47.32%     | 94.26% |
| B_3d-r1 | 23,455,470  | 7,008,048,408 | 47.26%     | 94.03% |
| B_3d-r2 | 24,058,239  | 7,189,730,008 | 47.00%     | 94.01% |
| B_3d-r3 | 21,801,574  | 6,512,960,250 | 46.91%     | 93.90% |
| B_5d-r1 | 21,924,147  | 6,545,456,728 | 47.04%     | 94.18% |
| B_5d-r2 | 21,906,947  | 6,543,301,272 | 47.23%     | 94.28% |
| B_5d-r3 | 22,912,551  | 6,844,933,142 | 47.11%     | 93.87% |
| B_7d-r1 | 21,914,247  | 6,549,980,300 | 46.98%     | 93.76% |
| B_7d-r2 | 22,127,007  | 6,603,514,010 | 47.02%     | 94.25% |
| B_7d-r3 | 21,459,140  | 6,417,388,280 | 46.42%     | 92.97% |

**Alignment results of each sample**

| Samples | Total Reads | Mapped Reads        | Uniq Mapped | Multiple Map |
|---------|-------------|---------------------|-------------|--------------|
|         |             |                     | Reads       | Reads        |
| 0d_r1   | 48,090,562  | 36,748,993 (76.42%) | 68.84%      | 7.57%        |
| 0d_r2   | 44,863,564  | 34,362,610 (76.59%) | 69.05%      | 7.55%        |
| 0d_r3   | 47,323,794  | 36,016,166 (76.11%) | 68.49%      | 7.62%        |
| D_1d_r1 | 44,338,898  | 33,811,671 (76.26%) | 68.86%      | 7.39%        |
| D_1d-r2 | 40,745,694  | 31,254,235 (76.71%) | 69.27%      | 7.44%        |
| D_1d-r3 | 45,553,902  | 34,968,887 (76.76%) | 69.35%      | 7.41%        |
| D_3d-r1 | 45,116,220  | 34,148,773 (75.69%) | 68.46%      | 7.23%        |
| D_3d-r2 | 44,317,804  | 33,582,095 (75.78%) | 68.53%      | 7.25%        |
| D_3d-r3 | 46,613,876  | 35,293,217 (75.71%) | 68.51%      | 7.21%        |
| D_5d-r1 | 51,220,230  | 38,591,963 (75.35%) | 68.11%      | 7.24%        |
| D_5d-r2 | 44,013,950  | 33,200,823 (75.43%) | 68.14%      | 7.29%        |
| D_5d-r3 | 48,238,820  | 36,543,599 (75.76%) | 68.39%      | 7.36%        |

|         |            |                     |        |       |
|---------|------------|---------------------|--------|-------|
| D_7d-r1 | 46,783,554 | 35,426,691 (75.72%) | 68.42% | 7.30% |
| D_7d-r2 | 48,956,212 | 36,669,962 (74.90%) | 67.63% | 7.27% |
| D_7d-r3 | 43,932,188 | 33,259,502 (75.71%) | 68.59% | 7.12% |
| B_1d-r1 | 48,727,438 | 37,388,407 (76.73%) | 69.17% | 7.56% |
| B_1d-r2 | 46,546,746 | 35,694,159 (76.68%) | 69.06% | 7.62% |
| B_1d-r3 | 47,775,234 | 36,410,225 (76.21%) | 68.64% | 7.57% |
| B_3d-r1 | 46,910,940 | 35,865,881 (76.46%) | 68.72% | 7.73% |
| B_3d-r2 | 48,116,478 | 36,714,197 (76.30%) | 68.68% | 7.62% |
| B_3d-r3 | 43,603,148 | 33,181,291 (76.10%) | 68.50% | 7.59% |
| B_5d-r1 | 43,848,294 | 33,502,809 (76.41%) | 68.77% | 7.64% |
| B_5d-r2 | 43,813,894 | 33,520,211 (76.51%) | 68.80% | 7.70% |
| B_5d-r3 | 45,825,102 | 34,954,771 (76.28%) | 68.63% | 7.65% |
| B_7d-r1 | 43,828,494 | 33,388,593 (76.18%) | 68.61% | 7.57% |
| B_7d-r2 | 44,254,014 | 33,782,630 (76.34%) | 68.71% | 7.63% |
| B_7d-r3 | 42,918,280 | 32,532,412 (75.80%) | 68.37% | 7.43% |

---
