# Supplementary material for: RNA-Seq Analysis Identifies Transcription Factors Involved in Anthocyanin Biosynthesis of ‘Red Zaosu’ Pear Peel and Functional Study of PpPIF8
Source: MDPI journal article supplement (doi:10.3390/ijms23094798), 2022-04-27
Supplement: s1 [file s1]

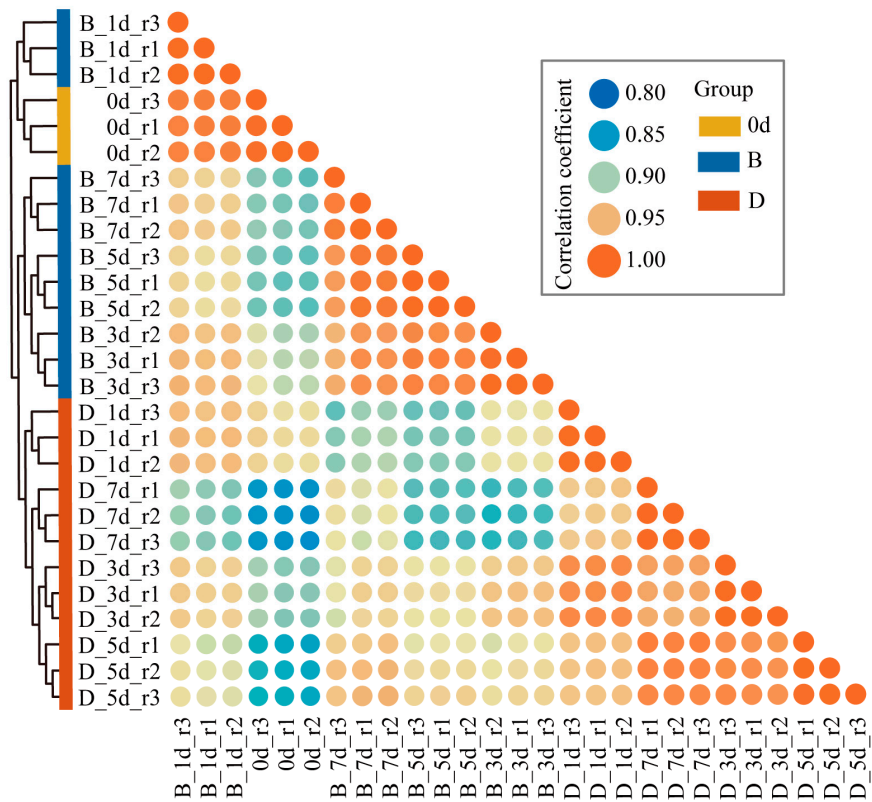

**Figure S1.** Spearman correlation and clustering analysis of sequencing sample.

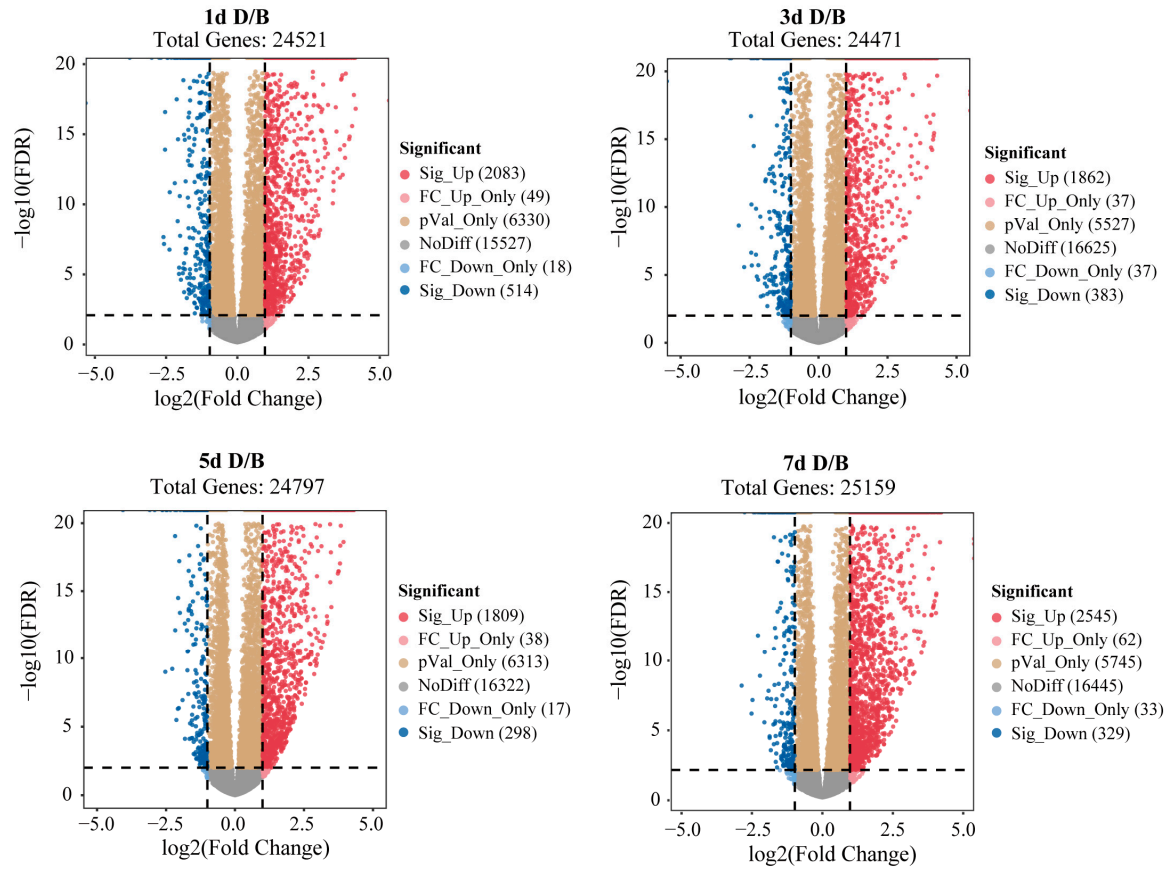

**Figure S2.** Volcano plots showing the differential gene expression between D and B group samples at different timepoint. Genes significantly upregulated and downregulated in D group samples are shown in red and blue, respectively.

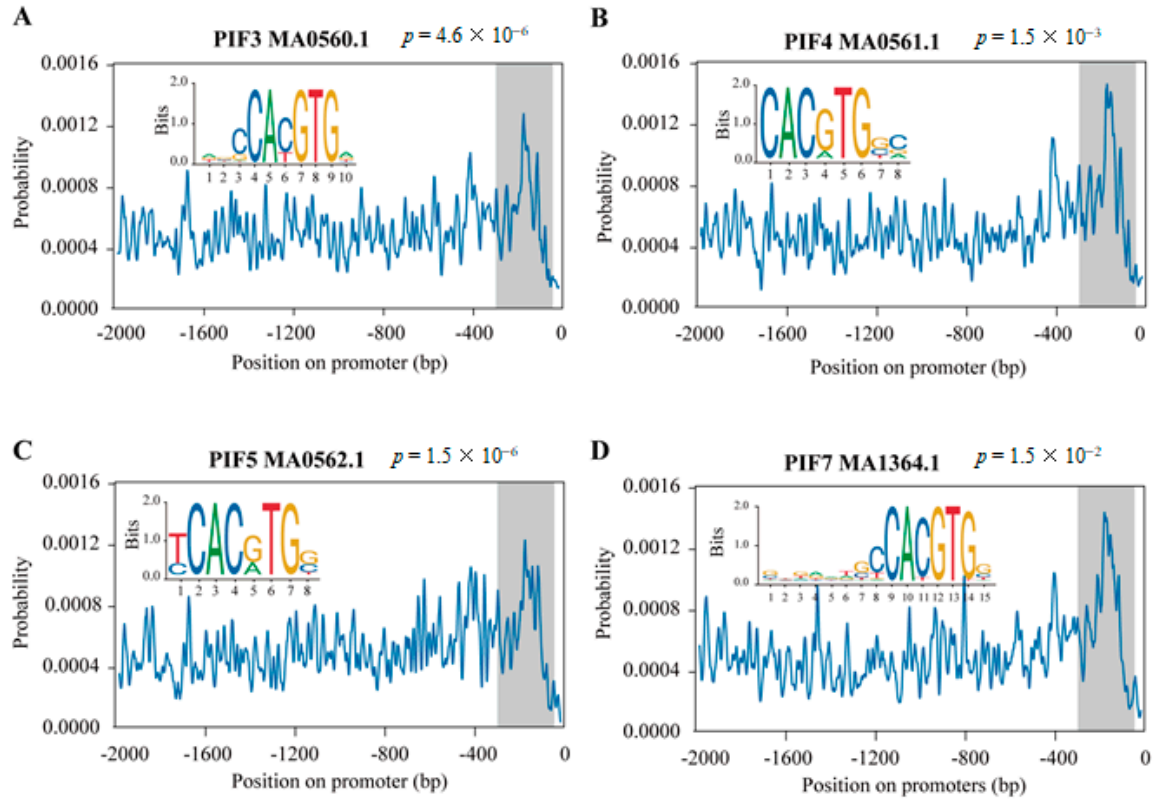

**Figure S3.** The distribution preference of the PIF3, PIF4, PIF5, and PIF7 binding site in the promoter region of genes in the “Blue” and “Turquoise” modules.
