# Supplementary material for: RNA-Seq Analysis Identifies Transcription Factors Involved in Anthocyanin Biosynthesis of ‘Red Zaosu’ Pear Peel and Functional Study of PpPIF8
Source: Int J Mol Sci. 2022 Apr 27;23(9):4798. doi: 10.3390/ijms23094798 (PMC9099880; doi:10.3390/ijms23094798)
Supplement: Supplementary file 1 [file ijms-23-04798-s001.zip]

Archive with 5 entries (5 files):
- ijms-1687962-supplementary figures.pdf
- Table S1.Primers used in this study.pdf
- Table S2.Sequencing data Statistics and Alignment results of each sample.pdf
- Table S3.The 3,158 genes in í░Blueí▒ and í░Turquoiseí▒ modules.xlsx
- Table S4.The 87 TFs were found and they belong to multiple transcription factor families.xlsx
