# Supplementary material for: RNA-Seq Analysis Identifies Transcription Factors Involved in Anthocyanin Biosynthesis of ‘Red Zaosu’ Pear Peel and Functional Study of PpPIF8
Source: Int J Mol Sci. 2022 Apr 27;23(9):4798. doi: 10.3390/ijms23094798 (PMC9099880; doi:10.3390/ijms23094798)
Supplement: Supplementary file 1 [file ijms-23-04798-s001.zip › Table S3.The 3,158 genes in í░Blueí▒ and í░Turquoiseí▒ modules.xlsx]

## Sheet: Table S3 Gene_module assignment
Gene ID	Module
gene3657	brown
gene30212	brown
gene16172	brown
gene20686	brown
gene7456	brown
gene28123	brown
gene2058	brown
gene25445	brown
gene1189	brown
gene25406	brown
gene13719	brown
gene1335	brown
gene23758	brown
gene33560	brown
gene29880	brown
gene31307	brown
gene5426	brown
gene16940	brown
gene16748	brown
gene6462	brown
gene17440	brown
gene5533	brown
gene15503	brown
gene3192	brown
gene19526	brown
gene26397	brown
gene4295	brown
gene12169	brown
gene441	brown
gene24458	brown
gene7021	brown
gene5695	brown
gene28128	brown
gene13944	brown
gene20117	brown
gene40044	brown
gene26323	brown
gene11421	brown
gene11410	brown
gene3196	brown
gene6053	brown
gene36459	brown
gene28101	brown
gene22220	brown
gene3193	brown
gene24140	brown
gene30913	brown
gene13884	brown
gene17533	brown
gene15418	brown
gene6510	brown
gene36752	brown
gene21134	brown
gene21887	brown
gene36287	brown
gene31940	brown
gene36266	brown
gene8623	brown
gene9851	brown
gene33829	brown
gene31943	brown
gene21764	brown
gene23709	brown
gene27485	brown
gene15811	brown
gene22688	brown
gene8883	brown
gene8799	brown
gene35731	brown
gene25926	brown
gene30324	brown
gene26568	brown
gene9424	brown
gene37000	brown
gene26898	brown
gene9439	brown
gene18572	brown
gene34793	brown
gene4829	brown
gene591	brown
gene19899	brown
gene11448	brown
gene31760	brown
gene39963	brown
gene21258	brown
gene23936	brown
gene14853	brown
gene26746	brown
gene34084	brown
gene22819	brown
gene2113	brown
gene18063	brown
gene11369	brown
gene30665	brown
gene24356	brown
gene7063	brown
gene29741	brown
gene22158	brown
gene6166	brown
gene17760	brown
gene18111	brown
gene35836	brown
gene5851	brown
gene21582	brown
gene20253	brown
gene17575	brown
gene11038	brown
gene13969	brown
gene9432	brown
gene24498	brown
gene415	brown
gene29282	brown
gene1498	brown
gene1060	brown
gene17538	brown
gene35280	brown
gene12129	brown
gene33628	brown
gene19730	brown
gene35493	brown
gene21123	brown
gene25716	brown
gene35789	brown
gene34259	brown
gene35419	brown
gene5869	brown
gene26932	brown
gene8230	brown
gene38170	brown
gene32067	brown
gene39868	brown
gene13388	brown
gene26615	brown
gene41060	brown
gene10544	brown
gene38457	brown
gene14384	brown
gene30196	brown
gene38934	brown
gene14616	brown
gene8931	brown
gene20728	brown
gene25557	brown
gene8970	brown
gene39450	brown
gene4187	brown
gene36013	brown
gene10416	brown
gene20299	brown
gene26512	brown
gene23563	brown
gene36058	brown
gene9429	brown
gene16445	brown
gene13043	brown
gene35656	brown
gene39155	brown
gene23418	brown
gene28857	brown
gene184	brown
gene38810	brown
gene27898	brown
gene19888	brown
gene17813	brown
gene33558	brown
gene19872	brown
gene4688	brown
gene36231	brown
gene30710	brown
gene24479	brown
gene18579	brown
gene13212	brown
gene21972	brown
gene12424	brown
gene660	brown
gene41890	brown
gene18743	brown
gene21565	brown
gene41491	brown
gene33297	brown
gene14122	brown
gene1783	brown
gene9414	brown
gene20885	brown
gene16974	brown
gene11530	brown
gene34932	brown
gene14117	brown
gene1164	brown
gene38834	brown
gene39942	brown
gene33027	brown
gene6976	brown
gene972	brown
gene4743	brown
gene33208	brown
gene36427	brown
gene19653	brown
gene16911	brown
gene6715	brown
gene20126	brown
gene37142	brown
gene16068	brown
gene33360	brown
gene37038	brown
gene3822	brown
gene37680	brown
gene20553	brown
gene6398	brown
gene23051	brown
gene22524	brown
gene16977	brown
gene30945	brown
gene29271	brown
gene4035	brown
gene24516	brown
gene24633	brown
gene40278	brown
gene15883	brown
gene17925	brown
gene10324	brown
gene7309	brown
gene4085	brown
gene38316	brown
gene2364	brown
gene12787	brown
gene4329	brown
gene26733	brown
gene8548	brown
gene28871	brown
gene35128	brown
gene809	brown
gene21895	brown
gene33737	brown
gene25561	brown
gene31136	brown
gene35300	brown
gene37131	brown
gene14206	brown
gene39316	brown
gene9513	brown
gene39534	brown
gene31724	brown
gene30709	brown
gene4510	brown
gene23545	brown
gene40188	brown
gene8539	brown
gene24632	brown
gene16843	brown
gene25198	brown
gene3611	brown
gene303	brown
gene22846	brown
gene9460	brown
gene4193	brown
gene10032	brown
gene24716	brown
gene8571	brown
gene12558	brown
gene24914	brown
gene41645	brown
gene24870	brown
gene4291	brown
gene30021	brown
gene1390	brown
gene8617	brown
gene9879	brown
gene6443	brown
gene24937	brown
gene17147	brown
gene5931	brown
gene11895	brown
gene40053	brown
gene19221	yellow
gene13896	yellow
gene11583	yellow
gene2889	yellow
gene38163	yellow
gene21583	yellow
gene30521	yellow
gene11199	yellow
gene10948	yellow
gene439	yellow
gene22912	yellow
gene18274	yellow
gene34370	yellow
gene2136	yellow
gene32819	yellow
gene7882	yellow
gene4316	yellow
gene30790	yellow
gene37650	yellow
gene38647	yellow
gene19416	yellow
gene27576	yellow
gene11473	yellow
gene12737	yellow
gene10458	yellow
gene14629	yellow
gene33196	yellow
gene7199	yellow
gene37655	yellow
gene31019	yellow
gene35542	yellow
gene350	yellow
gene9025	yellow
gene39226	yellow
gene26258	yellow
gene36449	yellow
gene18920	yellow
gene38522	yellow
gene24555	yellow
gene2059	yellow
gene17209	yellow
gene40425	yellow
gene5413	yellow
gene23957	yellow
gene35969	yellow
gene9316	yellow
gene34476	yellow
gene25986	yellow
gene33147	yellow
gene40273	yellow
gene40616	yellow
gene19814	yellow
gene6716	yellow
gene14158	yellow
gene4312	yellow
gene35785	yellow
gene28381	yellow
gene453	yellow
gene1267	yellow
gene7748	yellow
gene26611	yellow
gene1523	yellow
gene32550	yellow
gene35775	yellow
gene1681	yellow
gene18181	yellow
gene38637	yellow
gene37738	yellow
gene33047	yellow
gene29485	yellow
gene25006	yellow
gene25790	yellow
gene38490	yellow
gene7983	yellow
gene24653	yellow
gene37748	yellow
gene10105	yellow
gene25179	yellow
gene3586	yellow
gene9302	yellow
gene9266	yellow
gene35550	yellow
gene41233	yellow
gene1147	yellow
gene21063	yellow
gene19654	yellow
gene3228	yellow
gene5702	yellow
gene38941	yellow
gene17135	yellow
gene1572	yellow
gene9704	yellow
gene19213	yellow
gene34102	yellow
gene1634	yellow
gene11271	yellow
gene30929	yellow
gene16063	yellow
gene8792	yellow
gene29679	yellow
gene6267	yellow
gene35555	yellow
gene40087	yellow
gene14150	yellow
gene22013	yellow
gene40570	yellow
gene39792	yellow
gene28301	yellow
gene7519	yellow
gene3019	yellow
gene18135	yellow
gene9965	yellow
gene31061	yellow
gene35549	yellow
gene30173	yellow
gene14103	yellow
gene21963	yellow
gene32392	yellow
gene35651	yellow
gene36094	yellow
gene29530	yellow
gene30218	yellow
gene14312	yellow
gene1480	yellow
gene34627	yellow
gene13662	yellow
gene7809	yellow
gene4308	yellow
gene36214	yellow
gene30092	yellow
gene13374	yellow
gene20880	yellow
gene874	yellow
gene39858	yellow
gene28915	yellow
gene10946	yellow
gene2360	yellow
gene21666	yellow
gene6090	yellow
gene21419	yellow
gene12488	yellow
gene10487	yellow
gene8004	yellow
gene25188	yellow
gene10482	yellow
gene30473	yellow
gene10980	yellow
gene29328	yellow
gene12680	yellow
gene26344	yellow
gene8956	yellow
gene12371	yellow
gene33551	yellow
gene4574	yellow
gene15648	yellow
gene17498	yellow
gene25680	yellow
gene36296	yellow
gene27776	yellow
gene34912	yellow
gene12938	yellow
gene22142	yellow
gene19951	yellow
gene5764	yellow
gene6164	yellow
gene18604	yellow
gene30053	yellow
gene6231	yellow
gene12012	yellow
gene18664	yellow
gene27186	yellow
gene30413	yellow
gene14931	yellow
gene37960	yellow
gene30616	yellow
gene24760	yellow
gene27938	yellow
gene5026	yellow
gene18665	yellow
gene17715	yellow
gene23132	yellow
gene2338	yellow
gene37657	yellow
gene11681	yellow
gene13301	yellow
gene26953	yellow
gene4199	yellow
gene38645	yellow
gene20227	yellow
gene34774	yellow
gene1795	yellow
gene1280	yellow
gene28597	yellow
gene4812	yellow
gene11358	yellow
gene32350	yellow
gene38206	yellow
gene3808	yellow
gene9367	yellow
gene12954	yellow
gene8545	yellow
gene38641	yellow
gene26949	yellow
gene33544	yellow
gene6548	yellow
gene4732	yellow
gene29017	yellow
gene1674	yellow
gene39544	yellow
gene29564	yellow
gene17236	yellow
gene35678	yellow
gene619	yellow
gene4354	yellow
gene37647	yellow
gene37644	yellow
gene19219	yellow
gene19216	yellow
gene14684	yellow
gene9905	blue
gene1061	blue
gene15325	blue
gene28926	blue
gene21933	blue
gene35841	blue
gene4972	blue
gene3930	blue
gene33067	blue
gene36410	blue
gene3774	blue
gene3644	blue
gene22948	blue
gene7928	blue
gene22769	blue
gene40086	blue
gene7121	blue
gene22678	blue
gene18487	blue
gene2440	blue
gene21080	blue
gene36311	blue
gene4871	blue
gene19014	blue
gene15604	blue
gene4742	blue
gene21423	blue
gene4207	blue
gene3739	blue
gene13320	blue
gene39407	blue
gene31996	blue
gene6096	blue
gene20182	blue
gene39249	blue
gene433	blue
gene19982	blue
gene16928	blue
gene28495	blue
gene28953	blue
gene4903	blue
gene32325	blue
gene8766	blue
gene14087	blue
gene4369	blue
gene4873	blue
gene3476	blue
gene29466	blue
gene4214	blue
gene24284	blue
gene18612	blue
gene8286	blue
gene23940	blue
gene40010	blue
gene9858	blue
gene7820	blue
gene36560	blue
gene27958	blue
gene38042	blue
gene22978	blue
gene6929	blue
gene17881	blue
gene1679	blue
gene16240	blue
gene27798	blue
gene26625	blue
gene39709	blue
gene14780	blue
gene7407	blue
gene18538	blue
gene11097	blue
gene2653	blue
gene27140	blue
gene19329	blue
gene1695	blue
gene26717	blue
gene17795	blue
gene8100	blue
gene34555	blue
gene13243	blue
gene40412	blue
gene3886	blue
gene5700	blue
gene26135	blue
gene18407	blue
gene16869	blue
gene23839	blue
gene6270	blue
gene6423	blue
gene5399	blue
gene41627	blue
gene3889	blue
gene19898	blue
gene24348	blue
gene28680	blue
gene4965	blue
gene30428	blue
gene13523	blue
gene30510	blue
gene6468	blue
gene5408	blue
gene38285	blue
gene1192	blue
gene34632	blue
gene18286	blue
gene30605	blue
gene19167	blue
gene16422	blue
gene18456	blue
gene3404	blue
gene12855	blue
gene26088	blue
gene593	blue
gene33554	blue
gene4703	blue
gene35613	blue
gene8686	blue
gene18177	blue
gene14420	blue
gene7812	blue
gene14595	blue
gene41629	blue
gene2285	blue
gene36290	blue
gene28886	blue
gene1693	blue
gene35379	blue
gene60	blue
gene5661	blue
gene21682	blue
gene24420	blue
gene31381	blue
gene14185	blue
gene35701	blue
gene20255	blue
gene16309	blue
gene11957	blue
gene24717	blue
gene25565	blue
gene25333	blue
gene40350	blue
gene6259	blue
gene21434	blue
gene19379	blue
gene3749	blue
gene20729	blue
gene28028	blue
gene306	blue
gene13498	blue
gene26291	blue
gene13545	blue
gene2199	blue
gene41995	blue
gene25589	blue
gene25521	blue
gene29688	blue
gene23349	blue
gene27454	blue
gene34930	blue
gene6922	blue
gene4062	blue
gene22711	blue
gene4528	blue
gene21755	blue
gene4189	blue
gene21535	blue
gene15670	blue
gene22974	blue
gene31743	blue
gene20864	blue
gene20186	blue
gene34579	blue
gene16243	blue
gene18356	blue
gene1212	blue
gene37457	blue
gene38290	blue
gene25239	blue
gene11306	blue
gene16	blue
gene1200	blue
gene31929	blue
gene5736	blue
gene12655	blue
gene5002	blue
gene943	blue
gene4087	blue
gene846	blue
gene40433	blue
gene17399	blue
gene38890	blue
gene25002	blue
gene21721	blue
gene10014	blue
gene13246	blue
gene7579	blue
gene20171	blue
gene659	blue
gene17969	blue
gene5663	blue
gene9617	blue
gene22019	blue
gene29663	blue
gene34961	blue
gene12196	blue
gene17858	blue
gene2977	blue
gene33113	blue
gene26290	blue
gene17783	blue
gene40536	blue
gene40890	blue
gene17416	blue
gene20737	blue
gene4211	blue
gene30712	blue
gene26446	blue
gene11574	blue
gene16404	blue
gene30901	blue
gene28255	blue
gene36478	blue
gene894	blue
gene12127	blue
gene11214	blue
gene1037	blue
gene35849	blue
gene34612	blue
gene16915	blue
gene40779	blue
gene18589	blue
gene19169	blue
gene22832	blue
gene38581	blue
gene18621	blue
gene27679	blue
gene33835	blue
gene1287	blue
gene1544	blue
gene19720	blue
gene25554	blue
gene13572	blue
gene33820	blue
gene39892	blue
gene41231	blue
gene36121	blue
gene7558	blue
gene18116	blue
gene1792	blue
gene23247	blue
gene17408	blue
gene15626	blue
gene37826	blue
gene19588	blue
gene36620	blue
gene4191	blue
gene790	blue
gene20220	blue
gene6250	blue
gene10421	blue
gene22838	blue
gene16624	blue
gene10610	blue
gene17195	blue
gene29649	blue
gene14577	blue
gene40135	blue
gene9593	blue
gene28414	blue
gene21757	blue
gene1271	blue
gene26854	blue
gene11618	blue
gene14187	blue
gene26587	blue
gene42056	blue
gene7149	blue
gene39897	blue
gene21958	blue
gene36244	blue
gene28269	blue
gene19763	blue
gene3392	blue
gene22973	blue
gene1625	blue
gene41185	blue
gene4662	blue
gene26170	blue
gene40760	blue
gene20236	blue
gene32186	blue
gene22557	blue
gene9691	blue
gene31626	blue
gene1487	blue
gene21536	blue
gene12375	blue
gene36168	blue
gene17055	blue
gene7147	blue
gene17832	blue
gene15365	blue
gene8937	blue
gene33974	blue
gene22976	blue
gene33857	blue
gene31393	blue
gene14305	blue
gene15735	blue
gene29935	blue
gene15175	blue
gene29423	blue
gene5666	blue
gene14287	blue
gene10136	blue
gene25291	blue
gene6170	blue
gene4474	blue
gene34862	blue
gene33176	blue
gene29387	blue
gene34529	blue
gene6227	blue
gene33960	blue
gene1491	blue
gene7617	blue
gene6717	blue
gene14732	blue
gene35228	blue
gene24623	blue
gene25118	blue
gene40554	blue
gene26420	blue
gene26425	blue
gene18302	blue
gene21149	blue
gene12441	blue
gene14272	blue
gene7136	blue
gene2882	blue
gene20500	blue
gene28449	blue
gene13410	blue
gene218	blue
gene10381	blue
gene13808	blue
gene28060	blue
gene36242	blue
gene23762	blue
gene17774	blue
gene34034	blue
gene40913	blue
gene32855	blue
gene4442	blue
gene8233	blue
gene34306	blue
gene10826	blue
gene19845	blue
gene724	blue
gene22917	blue
gene35807	blue
gene9825	blue
gene32824	blue
gene2038	blue
gene30179	blue
gene17530	blue
gene6501	blue
gene15483	blue
gene37911	blue
gene31629	blue
gene38022	blue
gene6834	blue
gene21370	blue
gene14120	blue
gene12444	blue
gene13615	blue
gene30429	blue
gene199	blue
gene12572	blue
gene17372	blue
gene4974	blue
gene17106	blue
gene20655	blue
gene38166	blue
gene38039	blue
gene21418	blue
gene23334	blue
gene33694	blue
gene10972	blue
gene40262	blue
gene9329	blue
gene5660	blue
gene1076	blue
gene2871	blue
gene26432	blue
gene40987	blue
gene8005	blue
gene17759	blue
gene35903	blue
gene12427	blue
gene24160	blue
gene4680	blue
gene31507	blue
gene38152	blue
gene19046	blue
gene31277	blue
gene7126	blue
gene3432	blue
gene14328	blue
gene37866	blue
gene16419	blue
gene34462	blue
gene18980	blue
gene1103	blue
gene13481	blue
gene9097	blue
gene3606	blue
gene15054	blue
gene17124	blue
gene12084	blue
gene20819	blue
gene27742	blue
gene22701	blue
gene14890	blue
gene8351	blue
gene4989	blue
gene27953	blue
gene37879	blue
gene6907	blue
gene41835	blue
gene40171	blue
gene21243	blue
gene35727	blue
gene4257	blue
gene3256	blue
gene3460	blue
gene19313	blue
gene17953	blue
gene3725	blue
gene34618	blue
gene1391	blue
gene22857	blue
gene23714	blue
gene3746	blue
gene7463	blue
gene4468	blue
gene14208	blue
gene15181	blue
gene29332	blue
gene35327	blue
gene30338	blue
gene11560	blue
gene21359	blue
gene10830	blue
gene36808	blue
gene15081	blue
gene1814	blue
gene23557	blue
gene11686	blue
gene33876	blue
gene17261	blue
gene25560	blue
gene41812	blue
gene14314	blue
gene21781	blue
gene3477	blue
gene34091	blue
gene12550	blue
gene28221	blue
gene41808	blue
gene3010	blue
gene30987	blue
gene29846	blue
gene11304	blue
gene27450	blue
gene40502	blue
gene19446	blue
gene16718	blue
gene11010	blue
gene22538	blue
gene36538	blue
gene8281	blue
gene24839	blue
gene20711	blue
gene26881	blue
gene15029	blue
gene21558	blue
gene28636	blue
gene26339	blue
gene6001	blue
gene3695	blue
gene33656	blue
gene41532	blue
gene16250	blue
gene17071	blue
gene5039	blue
gene22741	blue
gene16233	blue
gene5145	blue
gene36371	blue
gene12819	blue
gene14534	blue
gene14047	blue
gene21888	blue
gene32216	blue
gene27026	blue
gene37837	blue
gene37442	blue
gene26360	blue
gene24554	blue
gene5438	blue
gene28585	blue
gene35961	blue
gene18160	blue
gene5014	blue
gene6190	blue
gene10612	blue
gene8291	blue
gene30824	blue
gene5466	blue
gene25731	blue
gene15884	blue
gene16229	blue
gene31518	blue
gene39517	blue
gene11102	blue
gene7205	blue
gene32853	blue
gene2201	blue
gene4552	blue
gene38831	blue
gene8019	blue
gene18300	blue
gene33485	blue
gene6840	blue
gene2215	blue
gene17262	blue
gene38164	blue
gene23763	blue
gene23417	blue
gene36079	blue
gene38288	blue
gene31809	blue
gene36556	blue
gene39956	blue
gene9013	blue
gene19192	blue
gene5946	blue
gene15201	blue
gene13704	blue
gene12653	blue
gene29545	blue
gene36355	blue
gene27921	blue
gene25059	blue
gene7707	blue
gene4120	blue
gene40181	blue
gene28057	blue
gene27317	blue
gene21882	blue
gene30058	blue
gene27034	blue
gene12000	blue
gene11661	blue
gene4907	blue
gene13795	blue
gene20190	blue
gene41813	blue
gene34926	blue
gene22409	blue
gene10312	blue
gene8983	blue
gene37820	blue
gene15753	blue
gene38566	blue
gene35782	blue
gene11786	blue
gene24334	blue
gene33080	blue
gene281	blue
gene18242	blue
gene5260	blue
gene9837	blue
gene3926	blue
gene22253	blue
gene25111	blue
gene2256	blue
gene23010	blue
gene37435	blue
gene30821	blue
gene18176	blue
gene38220	blue
gene4420	blue
gene5960	blue
gene19613	blue
gene2233	blue
gene22077	blue
gene23965	blue
gene11242	blue
gene39441	blue
gene1658	blue
gene13264	blue
gene26954	blue
gene35720	blue
gene23806	blue
gene15046	blue
gene3873	blue
gene34924	blue
gene22457	blue
gene35051	blue
gene15997	blue
gene30214	blue
gene28687	blue
gene37400	blue
gene23814	blue
gene11254	blue
gene17831	blue
gene40681	blue
gene38026	blue
gene8911	blue
gene8015	blue
gene22805	blue
gene8867	blue
gene26757	blue
gene12145	blue
gene13348	blue
gene128	blue
gene8662	blue
gene18537	blue
gene21556	blue
gene28553	blue
gene31933	blue
gene9791	blue
gene16597	blue
gene5091	blue
gene4617	blue
gene4739	blue
gene13238	blue
gene28964	blue
gene1902	blue
gene22094	blue
gene8628	blue
gene41374	blue
gene35979	blue
gene7194	blue
gene1890	blue
gene6177	blue
gene3533	blue
gene7260	blue
gene28863	blue
gene17766	blue
gene7211	blue
gene19743	blue
gene8556	blue
gene33089	blue
gene18552	blue
gene34286	blue
gene37368	blue
gene3597	blue
gene8378	blue
gene14961	blue
gene15916	blue
gene24365	blue
gene16111	blue
gene24680	blue
gene23210	blue
gene7563	blue
gene37166	blue
gene8646	blue
gene29972	blue
gene8980	blue
gene31244	blue
gene4737	blue
gene37975	blue
gene15693	blue
gene8320	blue
gene15722	blue
gene2745	blue
gene10583	blue
gene34829	blue
gene40015	blue
gene39240	blue
gene18970	blue
gene9986	blue
gene2667	blue
gene13030	blue
gene3098	blue
gene24095	blue
gene294	blue
gene18885	blue
gene4465	blue
gene22850	blue
gene17369	blue
gene3693	blue
gene37165	blue
gene27463	blue
gene29137	blue
gene40601	blue
gene18024	blue
gene22972	blue
gene1608	blue
gene39110	blue
gene23544	blue
gene23890	blue
gene21767	blue
gene14579	blue
gene18541	blue
gene14130	blue
gene35901	blue
gene29789	blue
gene3946	blue
gene24111	blue
gene3950	blue
gene7462	blue
gene27954	blue
gene27177	blue
gene1779	blue
gene40981	blue
gene39433	blue
gene11529	blue
gene10441	blue
gene32777	blue
gene26308	blue
gene28141	blue
gene37512	blue
gene5933	blue
gene31950	blue
gene38319	blue
gene33112	blue
gene258	blue
gene7075	blue
gene11128	blue
gene12642	blue
gene35017	blue
gene30701	blue
gene18582	blue
gene31751	blue
gene19121	blue
gene30243	blue
gene32769	blue
gene35690	blue
gene30321	blue
gene20272	blue
gene8308	blue
gene29527	blue
gene8056	blue
gene2046	blue
gene14438	blue
gene16961	blue
gene18543	blue
gene9057	blue
gene33542	blue
gene41097	blue
gene35526	blue
gene31752	blue
gene7897	blue
gene2363	blue
gene19632	blue
gene5479	blue
gene32061	blue
gene853	blue
gene24693	blue
gene551	blue
gene38458	blue
gene24820	blue
gene25798	blue
gene27797	blue
gene40072	blue
gene7651	blue
gene12840	blue
gene18540	blue
gene13558	blue
gene4178	blue
gene22429	blue
gene19841	blue
gene981	blue
gene18824	blue
gene17549	blue
gene29949	blue
gene8959	blue
gene4835	blue
gene31857	blue
gene3450	blue
gene39079	blue
gene21350	blue
gene11561	blue
gene17239	blue
gene33625	blue
gene17731	blue
gene12156	blue
gene35208	blue
gene12541	blue
gene14871	blue
gene10233	blue
gene26759	blue
gene31774	blue
gene3024	blue
gene8057	blue
gene11049	blue
gene33400	blue
gene19417	blue
gene35002	blue
gene8899	blue
gene14536	blue
gene214	blue
gene10211	blue
gene3504	blue
gene17128	blue
gene30104	blue
gene10084	blue
gene41727	blue
gene30123	blue
gene17718	blue
gene29145	blue
gene1338	blue
gene13602	blue
gene25442	blue
gene36212	blue
gene30989	blue
gene5634	blue
gene30749	blue
gene11054	blue
gene212	blue
gene22145	blue
gene27513	blue
gene28655	blue
gene8344	blue
gene3433	blue
gene11996	blue
gene3595	blue
gene41797	blue
gene3265	blue
gene4469	blue
gene32211	blue
gene16813	blue
gene37477	blue
gene2248	blue
gene6226	blue
gene3640	blue
gene29372	blue
gene18299	blue
gene25780	blue
gene34246	blue
gene33161	blue
gene4346	blue
gene34580	blue
gene32851	blue
gene22096	blue
gene25745	blue
gene14537	blue
gene27955	blue
gene8615	blue
gene37843	blue
gene23725	blue
gene36850	blue
gene12403	blue
gene9049	blue
gene32190	blue
gene1137	blue
gene26956	blue
gene32566	blue
gene13738	blue
gene14238	blue
gene38536	blue
gene27114	blue
gene11317	blue
gene600	blue
gene3923	blue
gene14429	blue
gene26861	blue
gene38796	blue
gene6486	blue
gene41595	blue
gene10048	blue
gene11902	blue
gene12328	blue
gene19691	blue
gene475	blue
gene4410	blue
gene1364	blue
gene34392	blue
gene17712	blue
gene31085	blue
gene2545	blue
gene9614	blue
gene10710	blue
gene9348	blue
gene1807	blue
gene2409	blue
gene6343	blue
gene23484	blue
gene8494	blue
gene19402	blue
gene5373	blue
gene36074	blue
gene12652	blue
gene3218	blue
gene26613	blue
gene9625	blue
gene6217	blue
gene32352	blue
gene16190	blue
gene23529	blue
gene25612	blue
gene7766	blue
gene9706	blue
gene32063	blue
gene17238	blue
gene39793	blue
gene33683	blue
gene14245	blue
gene3182	blue
gene861	blue
gene23184	blue
gene7602	blue
gene14437	blue
gene21863	blue
gene11992	blue
gene13200	blue
gene17104	blue
gene16330	blue
gene5658	blue
gene41019	blue
gene4061	blue
gene6228	blue
gene33407	blue
gene30044	blue
gene41020	blue
gene30013	blue
gene11333	blue
gene39663	blue
gene678	blue
gene14428	blue
gene4839	blue
gene38102	blue
gene22788	blue
gene38257	blue
gene31510	blue
gene25628	blue
gene18524	blue
gene17603	blue
gene15974	blue
gene27666	blue
gene4067	blue
gene18438	blue
gene23958	blue
gene9592	blue
gene9107	blue
gene8948	blue
gene8049	blue
gene7039	blue
gene6319	blue
gene5415	blue
gene41402	blue
gene41399	blue
gene38797	blue
gene37780	blue
gene37513	blue
gene32037	blue
gene28554	blue
gene27956	blue
gene27924	blue
gene25387	blue
gene2476	blue
gene24613	blue
gene24121	blue
gene23764	blue
gene22485	blue
gene19771	blue
gene18915	blue
gene18840	blue
gene18361	blue
gene16709	blue
gene15849	blue
gene15511	blue
gene14279	blue
gene14275	blue
gene11742	blue
gene11355	blue
gene41142	turquoise
gene9066	turquoise
gene15293	turquoise
gene3921	turquoise
gene10973	turquoise
gene11692	turquoise
gene12503	turquoise
gene40408	turquoise
gene24367	turquoise
gene29841	turquoise
gene21800	turquoise
gene27619	turquoise
gene22237	turquoise
gene16017	turquoise
gene8338	turquoise
gene29168	turquoise
gene34641	turquoise
gene26348	turquoise
gene2885	turquoise
gene22826	turquoise
gene11391	turquoise
gene39838	turquoise
gene21130	turquoise
gene22673	turquoise
gene3266	turquoise
gene19041	turquoise
gene10018	turquoise
gene7357	turquoise
gene222	turquoise
gene5126	turquoise
gene158	turquoise
gene30091	turquoise
gene37501	turquoise
gene523	turquoise
gene13970	turquoise
gene2836	turquoise
gene1045	turquoise
gene24523	turquoise
gene21300	turquoise
gene22815	turquoise
gene35330	turquoise
gene15773	turquoise
gene147	turquoise
gene36308	turquoise
gene18092	turquoise
gene10593	turquoise
gene35490	turquoise
gene29945	turquoise
gene35770	turquoise
gene22110	turquoise
gene26743	turquoise
gene11353	turquoise
gene10911	turquoise
gene25123	turquoise
gene41214	turquoise
gene40313	turquoise
gene21599	turquoise
gene23576	turquoise
gene36969	turquoise
gene27063	turquoise
gene8006	turquoise
gene23144	turquoise
gene9413	turquoise
gene35396	turquoise
gene16703	turquoise
gene24418	turquoise
gene7403	turquoise
gene4216	turquoise
gene25590	turquoise
gene28560	turquoise
gene2524	turquoise
gene16737	turquoise
gene4359	turquoise
gene6960	turquoise
gene31916	turquoise
gene32286	turquoise
gene27053	turquoise
gene11855	turquoise
gene20817	turquoise
gene17366	turquoise
gene4670	turquoise
gene34957	turquoise
gene32703	turquoise
gene10825	turquoise
gene19292	turquoise
gene7492	turquoise
gene31439	turquoise
gene6123	turquoise
gene25163	turquoise
gene33486	turquoise
gene10938	turquoise
gene556	turquoise
gene4712	turquoise
gene1662	turquoise
gene11845	turquoise
gene3541	turquoise
gene14214	turquoise
gene16084	turquoise
gene36959	turquoise
gene29566	turquoise
gene11856	turquoise
gene5465	turquoise
gene24018	turquoise
gene35455	turquoise
gene3115	turquoise
gene31575	turquoise
gene2833	turquoise
gene1305	turquoise
gene36329	turquoise
gene17573	turquoise
gene21378	turquoise
gene357	turquoise
gene12693	turquoise
gene15279	turquoise
gene602	turquoise
gene25850	turquoise
gene4333	turquoise
gene34964	turquoise
gene38314	turquoise
gene30345	turquoise
gene26147	turquoise
gene3615	turquoise
gene5420	turquoise
gene20902	turquoise
gene15918	turquoise
gene9893	turquoise
gene36415	turquoise
gene29448	turquoise
gene21358	turquoise
gene16014	turquoise
gene36182	turquoise
gene35658	turquoise
gene24221	turquoise
gene14546	turquoise
gene29919	turquoise
gene20699	turquoise
gene6207	turquoise
gene939	turquoise
gene34742	turquoise
gene29391	turquoise
gene2085	turquoise
gene13067	turquoise
gene24935	turquoise
gene30787	turquoise
gene33269	turquoise
gene6168	turquoise
gene24528	turquoise
gene19797	turquoise
gene41737	turquoise
gene27327	turquoise
gene6711	turquoise
gene32100	turquoise
gene8627	turquoise
gene14317	turquoise
gene28767	turquoise
gene22311	turquoise
gene7583	turquoise
gene16031	turquoise
gene37516	turquoise
gene22298	turquoise
gene22443	turquoise
gene28919	turquoise
gene35856	turquoise
gene10026	turquoise
gene15376	turquoise
gene41710	turquoise
gene14196	turquoise
gene34152	turquoise
gene36165	turquoise
gene35477	turquoise
gene35020	turquoise
gene17320	turquoise
gene20845	turquoise
gene12734	turquoise
gene5911	turquoise
gene29800	turquoise
gene2904	turquoise
gene35484	turquoise
gene6480	turquoise
gene22210	turquoise
gene17287	turquoise
gene13862	turquoise
gene31236	turquoise
gene4447	turquoise
gene25982	turquoise
gene4519	turquoise
gene29317	turquoise
gene27843	turquoise
gene13244	turquoise
gene1868	turquoise
gene17298	turquoise
gene10565	turquoise
gene4166	turquoise
gene3191	turquoise
gene5163	turquoise
gene24391	turquoise
gene25985	turquoise
gene17610	turquoise
gene6908	turquoise
gene40633	turquoise
gene340	turquoise
gene23621	turquoise
gene28753	turquoise
gene35297	turquoise
gene38486	turquoise
gene10366	turquoise
gene17382	turquoise
gene4545	turquoise
gene31452	turquoise
gene27902	turquoise
gene354	turquoise
gene2062	turquoise
gene10017	turquoise
gene7570	turquoise
gene22152	turquoise
gene137	turquoise
gene28025	turquoise
gene17999	turquoise
gene24117	turquoise
gene13241	turquoise
gene4523	turquoise
gene22601	turquoise
gene38489	turquoise
gene39746	turquoise
gene12863	turquoise
gene3363	turquoise
gene11531	turquoise
gene10431	turquoise
gene31	turquoise
gene41740	turquoise
gene30452	turquoise
gene13883	turquoise
gene36309	turquoise
gene28476	turquoise
gene6242	turquoise
gene31591	turquoise
gene14678	turquoise
gene15222	turquoise
gene27279	turquoise
gene41272	turquoise
gene16173	turquoise
gene5381	turquoise
gene28817	turquoise
gene19390	turquoise
gene9453	turquoise
gene14230	turquoise
gene5669	turquoise
gene27020	turquoise
gene9430	turquoise
gene14721	turquoise
gene11356	turquoise
gene4588	turquoise
gene26304	turquoise
gene34893	turquoise
gene4722	turquoise
gene23288	turquoise
gene20984	turquoise
gene2652	turquoise
gene36936	turquoise
gene16407	turquoise
gene18522	turquoise
gene23689	turquoise
gene18529	turquoise
gene17612	turquoise
gene34423	turquoise
gene29817	turquoise
gene20138	turquoise
gene9063	turquoise
gene15030	turquoise
gene26334	turquoise
gene22853	turquoise
gene35406	turquoise
gene5367	turquoise
gene31653	turquoise
gene26205	turquoise
gene38072	turquoise
gene24102	turquoise
gene34014	turquoise
gene29657	turquoise
gene22080	turquoise
gene31070	turquoise
gene29756	turquoise
gene21129	turquoise
gene10765	turquoise
gene25190	turquoise
gene21074	turquoise
gene37560	turquoise
gene12077	turquoise
gene11040	turquoise
gene4757	turquoise
gene38527	turquoise
gene26935	turquoise
gene29655	turquoise
gene20584	turquoise
gene23438	turquoise
gene9130	turquoise
gene9857	turquoise
gene2123	turquoise
gene39894	turquoise
gene18785	turquoise
gene757	turquoise
gene8514	turquoise
gene8014	turquoise
gene15988	turquoise
gene34457	turquoise
gene20211	turquoise
gene31402	turquoise
gene25194	turquoise
gene17913	turquoise
gene23304	turquoise
gene22672	turquoise
gene37630	turquoise
gene29659	turquoise
gene1261	turquoise
gene32019	turquoise
gene1204	turquoise
gene34892	turquoise
gene3244	turquoise
gene5662	turquoise
gene19731	turquoise
gene37171	turquoise
gene6031	turquoise
gene30750	turquoise
gene9089	turquoise
gene3721	turquoise
gene40046	turquoise
gene24880	turquoise
gene39061	turquoise
gene3861	turquoise
gene19859	turquoise
gene18614	turquoise
gene6873	turquoise
gene26126	turquoise
gene39895	turquoise
gene2053	turquoise
gene36585	turquoise
gene9946	turquoise
gene39967	turquoise
gene38609	turquoise
gene32174	turquoise
gene14451	turquoise
gene417	turquoise
gene38062	turquoise
gene4200	turquoise
gene16139	turquoise
gene16954	turquoise
gene11466	turquoise
gene20548	turquoise
gene6194	turquoise
gene6911	turquoise
gene4276	turquoise
gene6637	turquoise
gene15154	turquoise
gene21095	turquoise
gene30841	turquoise
gene12157	turquoise
gene24764	turquoise
gene4556	turquoise
gene40448	turquoise
gene17722	turquoise
gene19539	turquoise
gene33837	turquoise
gene27918	turquoise
gene14982	turquoise
gene19673	turquoise
gene7823	turquoise
gene1314	turquoise
gene22106	turquoise
gene16208	turquoise
gene11600	turquoise
gene12376	turquoise
gene26832	turquoise
gene13502	turquoise
gene16048	turquoise
gene1472	turquoise
gene26160	turquoise
gene12777	turquoise
gene2998	turquoise
gene39928	turquoise
gene9638	turquoise
gene7678	turquoise
gene24416	turquoise
gene26414	turquoise
gene14685	turquoise
gene6030	turquoise
gene3677	turquoise
gene8470	turquoise
gene20858	turquoise
gene14717	turquoise
gene5118	turquoise
gene31571	turquoise
gene14740	turquoise
gene25685	turquoise
gene13929	turquoise
gene19018	turquoise
gene8744	turquoise
gene31648	turquoise
gene13973	turquoise
gene15527	turquoise
gene14583	turquoise
gene7627	turquoise
gene6028	turquoise
gene5241	turquoise
gene2765	turquoise
gene32074	turquoise
gene25694	turquoise
gene8355	turquoise
gene8631	turquoise
gene10283	turquoise
gene33242	turquoise
gene24558	turquoise
gene20599	turquoise
gene21792	turquoise
gene6792	turquoise
gene19751	turquoise
gene33930	turquoise
gene4096	turquoise
gene9874	turquoise
gene7473	turquoise
gene5891	turquoise
gene27610	turquoise
gene33758	turquoise
gene37848	turquoise
gene9818	turquoise
gene3170	turquoise
gene10539	turquoise
gene28728	turquoise
gene19776	turquoise
gene10596	turquoise
gene12728	turquoise
gene40711	turquoise
gene7884	turquoise
gene27457	turquoise
gene155	turquoise
gene30642	turquoise
gene25342	turquoise
gene30612	turquoise
gene6113	turquoise
gene5191	turquoise
gene15889	turquoise
gene1049	turquoise
gene2967	turquoise
gene30720	turquoise
gene22100	turquoise
gene25991	turquoise
gene3911	turquoise
gene28779	turquoise
gene13405	turquoise
gene33963	turquoise
gene28034	turquoise
gene24151	turquoise
gene10614	turquoise
gene11417	turquoise
gene1749	turquoise
gene9610	turquoise
gene33264	turquoise
gene34939	turquoise
gene25152	turquoise
gene7068	turquoise
gene26575	turquoise
gene16734	turquoise
gene29440	turquoise
gene7448	turquoise
gene2949	turquoise
gene32421	turquoise
gene9380	turquoise
gene30766	turquoise
gene28425	turquoise
gene16663	turquoise
gene1325	turquoise
gene9489	turquoise
gene19060	turquoise
gene18963	turquoise
gene19300	turquoise
gene3321	turquoise
gene1588	turquoise
gene1968	turquoise
gene11027	turquoise
gene33465	turquoise
gene5252	turquoise
gene36645	turquoise
gene6635	turquoise
gene10351	turquoise
gene32228	turquoise
gene34692	turquoise
gene30769	turquoise
gene34946	turquoise
gene18265	turquoise
gene15995	turquoise
gene17991	turquoise
gene3188	turquoise
gene2428	turquoise
gene37076	turquoise
gene40328	turquoise
gene21960	turquoise
gene30734	turquoise
gene34864	turquoise
gene26209	turquoise
gene29839	turquoise
gene1244	turquoise
gene1216	turquoise
gene27624	turquoise
gene33889	turquoise
gene3258	turquoise
gene13436	turquoise
gene16107	turquoise
gene33076	turquoise
gene10810	turquoise
gene6054	turquoise
gene24358	turquoise
gene16736	turquoise
gene34845	turquoise
gene19695	turquoise
gene20334	turquoise
gene7628	turquoise
gene28984	turquoise
gene15827	turquoise
gene41974	turquoise
gene25331	turquoise
gene24096	turquoise
gene12645	turquoise
gene20193	turquoise
gene27352	turquoise
gene37631	turquoise
gene29806	turquoise
gene21296	turquoise
[truncated: 2,149 more rows]
