# Supplementary material for: RNA-Seq Analysis Identifies Transcription Factors Involved in Anthocyanin Biosynthesis of ‘Red Zaosu’ Pear Peel and Functional Study of PpPIF8
Source: Int J Mol Sci. 2022 Apr 27;23(9):4798. doi: 10.3390/ijms23094798 (PMC9099880; doi:10.3390/ijms23094798)
Supplement: Supplementary file 1 [file ijms-23-04798-s001.zip › Table S4.The 87 TFs were found and they belong to multiple transcription factor families.xlsx]

## Sheet: Table S4 centrimo 
db_index	motif_id	motif_alt_id	consensus	E-value	adj_p-value	log_adj_p-value	bin_location	bin_width	total_width	sites_in_bin	total_sites	p_success	p-value	mult_tests
1	MA0941.1	ABF2	NNNDACACGTGDN	0.0015	3.1e-06	-12.68	0	1848	1988	2991	3133	0.92958	3.1e-09	993
1	MA0930.1	ABF3	ACACGTGT	0.61	0.0013	-6.68	0	1781	1993	1421	1529	0.89363	1.3e-06	996
1	MA0931.1	ABI5	NGMCACGTGK	0.001	2.1e-06	-13.08	0	1829	1991	2538	2677	0.91863	2.1e-09	995
1	MA1204.1	AGL13	TTWCCAAAAAWRGWAAAW	0.9	0.0018	-6.3	0	1733	1983	1719	1893	0.87393	1.9e-06	991
1	MA1201.1	AGL42	CATCATY	1.8	0.0036	-5.62	0	978	1994	1534	2881	0.49047	3.6e-06	996
1	MA0932.1	AHL12	AAWWWWTT	2.5e-07	5.1e-10	-21.39	0	1687	1993	2802	3147	0.84646	5.1e-13	996
1	MA0933.1	AHL20	AATTAAWT	1.3e-13	2.7e-16	-35.87	0	1645	1993	2783	3152	0.82539	2.7e-19	996
1	MA0934.1	AHL25	AWTTAAWT	7.7e-13	1.6e-15	-34.08	0	1631	1993	2754	3145	0.81836	1.6e-18	996
1	MA1375.1	ANL2	GCATTAATTRY	1.7e-07	3.5e-10	-21.76	0	1722	1990	2605	2866	0.86533	3.6e-13	994
1	MA1098.1	ARALYDRAFT_484486	GGSCCCAC	5.7	0.012	-4.45	0	1839	1993	2486	2633	0.92273	1.2e-05	996
1	MA1095.1	ARALYDRAFT_495258	GGSCCCAC	5.7	0.012	-4.45	0	1839	1993	2486	2633	0.92273	1.2e-05	996
1	MA1338.1	AREB3	DDWGGWSACGTGGCA	1.6	0.0032	-5.74	0	1856	1986	1082	1120	0.93454	3.3e-06	992
1	MA1366.1	AT1G76880	AYRGTAAAAAWDDWWW	0.19	0.00039	-7.86	0	1525	1985	2521	3132	0.76826	3.9e-07	992
1	MA1380.1	AT2G20110	WTTTAAATTTTTWAA	1.9e-11	4e-14	-30.86	0	1612	1986	2624	3021	0.81168	4e-17	992
1	MA1365.1	AT5G47660	WWHHWTTTTTACYGY	5.9	0.012	-4.42	0	1526	1986	2489	3111	0.76838	1.2e-05	992
1	MA0950.1	ATHB-12	AATGATTG	0.0033	6.8e-06	-11.9	0	1679	1993	2769	3153	0.84245	6.8e-09	996
1	MA1212.1	ATHB13	HYAATAATTDW	2.5e-07	5.1e-10	-21.4	0	1606	1990	2644	3088	0.80704	5.1e-13	994
1	MA0951.1	ATHB-16	TAATMATT	9.5e-12	1.9e-14	-31.57	0	1631	1993	2711	3101	0.81836	1.9e-17	996
1	MA1211.1	ATHB18	NYAATYATTDD	0.062	0.00013	-8.97	0	1678	1990	2618	2986	0.84322	1.3e-07	994
1	MA1209.1	ATHB20	HYAATAATTRA	4.5e-08	9.2e-11	-23.11	0	1522	1990	2233	2713	0.76482	9.2e-14	994
1	MA1327.1	ATHB23	AWWNWTAATTAATDAWWWAWTW	6.9e-16	1.4e-18	-41.1	0	1635	1979	2718	3061	0.82617	1.4e-21	989
1	MA1330.1	ATHB24	AAWHRTAATTAAKDW	2.6e-14	5.2e-17	-37.49	0	1544	1986	2610	3097	0.77744	5.3e-20	992
1	MA1329.1	ATHB25	THAYTAATTAHNHWW	6.3e-05	1.3e-07	-15.87	0	1544	1986	2503	3038	0.77744	1.3e-10	992
1	MA1326.1	ATHB33	NHGTRATTARB	1.6e-05	3.3e-08	-17.22	0	1676	1990	2715	3072	0.84221	3.3e-11	994
1	MA1328.1	ATHB34	WTWAWHNVYTAATYA	2.5e-10	5.2e-13	-28.29	0	1632	1986	2706	3093	0.82175	5.2e-16	992
1	MA1406.1	ATHB4	YAATSATTGB	0.028	5.8e-05	-9.76	0	1603	1991	2615	3106	0.80512	5.8e-08	995
1	MA1214.1	ATHB40	DHACCAATAATTGDDNHHWWW	0.0011	2.2e-06	-13.05	0	1554	1980	2370	2859	0.78485	2.2e-09	989
1	MA0952.1	ATHB-51	AATWATTG	2.9e-09	5.9e-12	-25.86	0	1527	1993	2559	3109	0.76618	5.9e-15	996
1	MA1215.1	ATHB53	HCAATAATTGD	9.8e-06	2e-08	-17.73	0	1612	1990	2515	2936	0.81005	2e-11	994
1	MA0953.1	ATHB-6	NCAATHATD	0.0011	2.2e-06	-13.03	0	1666	1992	2756	3154	0.83635	2.2e-09	995
1	MA0954.2	ATHB7	TCAATGATTGRWT	0.25	0.00052	-7.57	0	1730	1988	2676	2975	0.87022	5.2e-07	993
1	MA0958.1	BHLH13	RCACGTGC	1.9	0.0039	-5.56	0	1847	1993	2509	2645	0.92674	3.9e-06	996
1	MA1361.1	bHLH18	CRCGTKWWHCACGTGKN	2.8	0.0058	-5.15	0	1786	1984	2131	2299	0.9002	5.9e-06	991
1	MA1359.1	bHLH31	VWBDHVNCACGTGBNHNWSWC	0.048	9.9e-05	-9.22	0	1844	1980	2256	2357	0.93131	1e-07	989
1	MA1407.1	bZIP14	DVTGACGTAH	7.6	0.016	-4.17	0	1849	1991	2931	3094	0.92868	1.6e-05	995
1	MA1344.1	bZIP28	DNWKRTSACGTGGCA	0.56	0.0012	-6.77	0	1906	1986	2231	2281	0.95972	1.2e-06	992
1	MA1340.1	bZIP3	DDTGMTGACGTGGCA	0.015	3e-05	-10.4	0	1822	1986	1917	2020	0.91742	3.1e-08	992
1	MA1337.1	bZIP44	DWWGCTGACGTGGCA	0.022	4.6e-05	-10	0	1856	1986	1233	1273	0.93454	4.6e-08	992
1	MA1345.1	bZIP48	GCCACGTCAGCAWH	0.14	0.00028	-8.19	0	1907	1987	1265	1285	0.95974	2.8e-07	993
1	MA1341.1	bZIP53	DWTGCTGACGTGGCA	0.68	0.0014	-6.58	0	1888	1986	1339	1372	0.95065	1.4e-06	992
1	MA1347.1	bZIP68	TGCCACGTSABCWHH	0.21	0.00043	-7.75	0	1822	1986	2058	2177	0.91742	4.4e-07	992
1	MA0990.1	EDT1	HAWTWAATGC	0.1	0.00021	-8.47	0	1559	1991	2585	3154	0.78302	2.1e-07	995
1	MA0128.1	EmBP-1	ASACGTGG	2.3	0.0047	-5.36	0	1899	1993	2908	3000	0.95283	4.7e-06	996
1	MA1351.1	GBF3	TGCCACGTCABCWHH	0.057	0.00012	-9.05	0	1820	1986	1573	1656	0.91641	1.2e-07	992
1	MA1334.1	GBF6	TGCCACGTCAGCAWH	0.034	6.9e-05	-9.58	0	1888	1986	1447	1480	0.95065	7e-08	992
1	MA1207.1	GT3a	RRCACGTGTHWAAWDTD	3.5e-05	7.1e-08	-16.46	0	1836	1984	2534	2650	0.9254	7.2e-11	991
1	MA1024.1	HAT1	SYAATCATKN	0.43	0.00088	-7.03	0	1679	1991	2687	3075	0.84329	8.9e-07	995
1	MA1198.1	HAT2	WNYAATCATTD	0.00013	2.6e-07	-15.18	0	1608	1990	2627	3087	0.80804	2.6e-10	994
1	MA1210.1	HAT22	MHYAATCATT	1.7	0.0035	-5.66	0	1679	1991	2690	3084	0.84329	3.5e-06	995
1	MA0008.2	HAT5	YYCAATTATTGS	0.05	0.0001	-9.18	0	1517	1989	2272	2828	0.76269	1e-07	994
1	MA1369.1	HDG1	RYAATTAATGM	1.4e-08	2.8e-11	-24.3	0	1722	1990	2679	2943	0.86533	2.8e-14	994
1	MA1174.1	MYB56	WWWWATAACGGWHWT	0.0022	4.6e-06	-12.29	0	1642	1986	2633	3043	0.82679	4.6e-09	992
1	MA1293.1	MYB57	YYTACCTAACTTTW	1.9	0.004	-5.53	0	1751	1987	1174	1276	0.88123	4e-06	993
1	MA1294.1	MYB62	AHWAWAGTTAGGYAD	0.034	7e-05	-9.56	0	964	1986	1640	3076	0.4854	7.1e-08	992
1	MA0568.1	MYC3	VCACGTGB	0.065	0.00013	-8.92	0	1847	1993	2925	3080	0.92674	1.3e-07	996
1	MA0569.1	MYC4	RCACGTGC	5.4	0.011	-4.51	0	1847	1993	2632	2779	0.92674	1.1e-05	996
1	MA1046.1	NTL9	TTAAGTAAT	3.2e-07	6.5e-10	-21.16	0	1622	1992	1977	2273	0.81426	6.5e-13	995
1	MA1033.1	OJ1058_F05.8	MCACGTGK	0.0032	6.5e-06	-11.94	0	1789	1993	2331	2505	0.89764	6.5e-09	996
1	MA1021.1	PHYPADRAFT_48267	YCACGTGC	0.42	0.00086	-7.06	0	1843	1993	2532	2670	0.92474	8.7e-07	996
1	MA0560.1	PIF3	DBCCACGTGR	0.0023	4.6e-06	-12.28	0	1845	1991	2237	2340	0.92667	4.7e-09	995
1	MA0561.1	PIF4	CACGTGSC	0.73	0.0015	-6.5	0	1845	1993	1703	1786	0.92574	1.5e-06	996
1	MA0562.1	PIF5	TCACGTGS	0.00074	1.5e-06	-13.4	0	1847	1993	1598	1662	0.92674	1.5e-09	996
1	MA1364.1	PIF7	SDKRDWGCCACGTGG	7.2	0.015	-4.23	0	1816	1986	2003	2133	0.9144	1.5e-05	992
1	MA1379.1	SOL1	WTTWAAAATTTAAAW	1.7e-10	3.4e-13	-28.7	0	1610	1986	2583	2982	0.81067	3.5e-16	992
1	MA0578.1	SPL8	WWDWHYGTACHHYWWW	0.00014	2.8e-07	-15.09	0	1763	1985	2483	2687	0.88816	2.8e-10	992
1	MA1061.1	SPT	CCCACGTGN	1.7	0.0034	-5.68	0	1846	1992	2969	3135	0.92671	3.4e-06	995
1	MA1062.1	TCP15	GGGCCCAC	4.7	0.0097	-4.63	0	1845	1993	2402	2536	0.92574	9.8e-06	996
1	MA1066.1	TCP23	GGGCCCAC	7.3	0.015	-4.2	0	1845	1993	2524	2667	0.92574	1.5e-05	996
1	MA1162.1	TCX2	WTTYAAAATTYAAAW	4.2e-08	8.5e-11	-23.19	0	1610	1986	2598	3016	0.81067	8.6e-14	992
1	MA0129.1	TGA1A	HACGTCA	0.62	0.0013	-6.68	0	18	1994	57	3121	0.00903	1.3e-06	996
1	MA1047.1	TGA5	VTGACGTV	7	0.014	-4.25	0	1861	1993	2574	2701	0.93377	1.4e-05	996
1	MA1070.1	TGA7	NRTGACGTCA	0.06	0.00012	-9	0	1809	1991	2935	3142	0.90859	1.2e-07	995
1	MA1161.1	TSO1	WWTTWAAAATTTAAA	1.5e-05	3e-08	-17.32	0	1634	1986	2644	3051	0.82276	3e-11	992
1	MA1074.1	UNE10	CCACGTGM	1.5	0.0032	-5.76	0	1781	1993	1037	1111	0.89363	3.2e-06	996
1	MA1295.1	WRKY20	DNCGTTGACYWDD	0.97	0.002	-6.22	0	1776	1988	2389	2595	0.89336	2e-06	993
1	MA1303.1	WRKY22	AAAAGTCAACKNH	1.1	0.0023	-6.06	0	1818	1988	2096	2228	0.91449	2.4e-06	993
1	MA1311.1	WRKY28	DDCGTTGACTTTT	2.5	0.0051	-5.28	0	1768	1988	2690	2942	0.88934	5.1e-06	993
1	MA1309.1	WRKY3	AAAAGTCAACG	1.4	0.0029	-5.85	0	1776	1990	2272	2470	0.89246	2.9e-06	994
1	MA1301.1	WRKY33	AAAAGTCAACG	0.59	0.0012	-6.72	0	1768	1990	2204	2401	0.88844	1.2e-06	994
1	MA1085.2	WRKY40	HWAGTCAANN	1.7	0.0035	-5.65	0	1817	1991	2567	2742	0.91261	3.5e-06	995
1	MA1317.1	WRKY50	YKTTGACTTTTTH	1.2	0.0026	-5.97	0	1764	1988	2361	2581	0.88732	2.6e-06	993
1	MA1305.1	WRKY55	DNCGTTGACTTT	2.3	0.0048	-5.34	0	1759	1989	2202	2413	0.88436	4.8e-06	994
1	MA1304.1	WRKY59	HAAAAGTCAAMN	0.0019	3.8e-06	-12.48	0	1765	1989	2766	3008	0.88738	3.8e-09	994
1	MA1300.1	WRKY6	CGTTGACTWWDDYWDWNHH	7.1	0.014	-4.24	0	1768	1982	1911	2078	0.89203	1.5e-05	990
1	MA1091.1	WRKY62	TGGTCAAC	0.41	0.00083	-7.09	0	1777	1993	2233	2425	0.89162	8.4e-07	996
1	MA1316.1	WRKY71	AAAAGTCAACG	0.036	7.3e-05	-9.53	0	1766	1990	2243	2438	0.88744	7.3e-08	994
1	MA1093.1	WRKY75	HRGTCAAC	2.3	0.0048	-5.35	0	1777	1993	2528	2757	0.89162	4.8e-06	996
